# Supplementary material for: Efficacy and Safety of Non–Vitamin K Antagonist Oral Anticoagulants in Atrial Fibrillation Patients With Impaired Liver Function: A Retrospective Cohort Study
Source: PubMed Central journal article supplement — J Am Heart Assoc. 2018 Jul 27;7(15):e009263. doi: 10.1161/JAHA.118.009263 (PMC6201449; doi:10.1161/jaha.118.009263), 2018-07-27
Supplement: JAH3-7-e009263-s001.pdf [file JAH3-7-e009263-s001.pdf]

# **SUPPLEMENTAL MATERIAL**

**Table S1. Using 7 days as a censoring window for drug switches.**

| 7 days                          | Crude            |                | Adjusted*        |                |
|---------------------------------|------------------|----------------|------------------|----------------|
|                                 | HR (95% CI)      | <i>P</i> value | HR (95% CI)      | <i>P</i> value |
| Normal Liver function (n=5818)  |                  |                |                  |                |
| S/SE                            | 0.78 (0.68-0.90) | <0.001         | 0.75 (0.66-0.87) | <0.001         |
| Major bleeding                  | 0.87 (0.66-1.15) | 0.328          | 0.83 (0.63-1.11) | 0.210          |
| GI bleeding                     | 1.36 (1.00-1.84) | 0.049          | 1.32 (0.97-1.81) | 0.082          |
| Death                           | 0.70 (0.61-0.80) | <0.001         | 0.69 (0.60-0.80) | <0.001         |
| Impaired liver function (n=633) |                  |                |                  |                |
| S/SE                            | 0.87 (0.58-1.30) | 0.497          | 0.68 (0.44-1.05) | 0.085          |
| Major bleeding                  | 1.15 (0.63-2.08) | 0.655          | 1.32 (0.70-2.49) | 0.395          |
| GI bleeding                     | 1.49 (0.79-2.82) | 0.217          | 1.68 (0.86-3.29) | 0.132          |
| Death                           | 0.68 (0.53-0.87) | 0.002          | 0.63 (0.49-0.82) | <0.001         |

CI, confidence interval; GI, gastrointestinal; HR, hazard ratio; S/SE, stroke or systemic embolism.

\*Adjusted for age, sex, hypertension, diabetes mellitus, chronic kidney disease, history of myocardial infarction, history of ischemic heart disease, history of systemic embolism, history of peripheral vascular disease, history of transient ischemic attack, history of stroke, history of heart failure, statins, amiodarone, anticonvulsants, nonsteroidal anti-inflammatory drug, aspirin, clopidogrel, and ticagrelor.
